# Supplementary material
Source: PubMed Central journal article supplement (PMC3484248)
Supplement: NIHMS371007-supplement-2.pdf [file NIHMS371007-supplement-2.pdf]

**Supplemental Table S1.** Primer set sequences for qRT-PCR analysis.

| Primer Set | Forward               | Reverse                 |
|------------|-----------------------|-------------------------|
| GDF15      | GGGCAAGAACTCAGGACGG   | TCTGGAGTCTTCGGAGTGCAA   |
| IL-29      | TATGTGGCCGATGGGAACCT  | AGGGTGGGTTGACGTTCTCA    |
| OAS-1      | TGTCCAAGGTGGTAAAGGGTG | CCGGCGATTTAACTGATCCTG   |
| MX1        | GTTTCCGAAGTGGACATCGCA | CCATTCAGTAATAGAGGGTGGGA |
| IFTM1      | TCGCCTACTCCGTGAAGTCT  | ATGAGGATGCCCAGAATCAG    |
| IL28A      | CACCCTGCACCATATCCTCT  | CACTGGCAACACAATTCAGG    |
| IL28B      | CTGCTGAAGGACTGCAAGTG  | GAGGATATGGTGCAGGGTGT    |
| Suz12      | TGCAGTTCACTCTTCGTTGG  | TGCTTCAGTTTGTTCCTTG     |
| GAPDH      | GAGTCAACGGATTTGGTCGT  | GACAAGCTTCCCGTTCTCAG    |

**Supplemental Table S2.** Univariate and multivariate Cox proportional hazard regression analyses of OS in the pancreatic cancer patient cohort (n=102).<sup>a</sup>

|                            | Univariate       |         | Multivariate     |         |
|----------------------------|------------------|---------|------------------|---------|
|                            | HR(95% CI)       | p value | HR(95% CI)       | p value |
| HOTAIR level (high vs low) | 1.1619 to 4.2936 | 0.0165  | 1.1842 to 4.4320 | 0.0143  |
| N stage                    | 1.0534 to 3.2432 | 0.0331  | 1.0712 to 3.6031 | 0.0299  |
| T stage                    | 0.6232 to 1.8116 | 0.8245  | 0.4825 to 1.4304 | 0.5058  |

<sup>a</sup> Univariate and multivariate Cox proportional hazards regression analyses were carried out in the pancreatic cancer cohort (GSE21501) to evaluate the prognostic value of HOTAIR expression level in combination with other clinical variables including N stage and T stage. In the univariate analysis, HOTAIR level and N stage were significantly associated with Overall Survival (p=0.0165 and p=0.00331, respectively). Similarly, both HOTAIR level and N stage exhibited the significance (p=0.00143 and p=0.0299 ).

**Supplemental Table S3.** GSEA Analysis results (20 significant enrichment plots) using HOTAIR high (N=14) vs low (N=88) gene signatures obtained from pancreatic patient data (GSE21501).

| GO TERM Biological Pathways             | SIZE | ES   | NES  | NOM p-val | FDR q-val | FWER p-val |
|-----------------------------------------|------|------|------|-----------|-----------|------------|
| DNA_REPLICATION_INITIATION              | 15   | 0.78 | 2.08 | 0         | 0.04      | 0.04       |
| REGULATION_OF_MITOSIS                   | 40   | 0.60 | 1.89 | 0.02      | 0.12      | 0.22       |
| CHROMOSOME_SEGREGATION                  | 31   | 0.63 | 1.83 | 0         | 0.17      | 0.34       |
| ORGANELLE_LOCALIZATION                  | 23   | 0.55 | 1.81 | 0         | 0.15      | 0.35       |
| M_PHASE_OF_MITOTIC_CELL_CYCLE           | 83   | 0.53 | 1.78 | 0.04      | 0.16      | 0.45       |
| CELL_CYCLE_PROCESS                      | 186  | 0.46 | 1.77 | 0.03      | 0.15      | 0.47       |
| CYTOKINESIS                             | 15   | 0.64 | 1.77 | 0.05      | 0.13      | 0.47       |
| CELL_CYCLE_PHASE                        | 166  | 0.45 | 1.77 | 0.05      | 0.11      | 0.47       |
| ESTABLISHMENT_OF_ORGANELLE_LOCALIZATION | 16   | 0.63 | 1.77 | 0         | 0.10      | 0.47       |
| MITOSIS                                 | 81   | 0.53 | 1.75 | 0.04      | 0.10      | 0.52       |
| MITOTIC_CELL_CYCLE                      | 148  | 0.47 | 1.74 | 0.05      | 0.11      | 0.57       |
| CELL_CYCLE_CHECKPOINT_GO_0000075        | 46   | 0.51 | 1.72 | 0.02      | 0.12      | 0.65       |
| M_PHASE                                 | 110  | 0.51 | 1.71 | 0.06      | 0.12      | 0.67       |
| DNA_PACKAGING                           | 34   | 0.46 | 1.71 | 0         | 0.11      | 0.67       |
| DNA_REPLICATION                         | 100  | 0.42 | 1.71 | 0         | 0.11      | 0.68       |
| CELL_DIVISION                           | 17   | 0.60 | 1.70 | 0.06      | 0.10      | 0.69       |
| SISTER_CHROMATID_SEGREGATION            | 17   | 0.65 | 1.69 | 0.04      | 0.11      | 0.71       |
| DNA_DEPENDENT_DNA_REPLICATION           | 54   | 0.47 | 1.68 | 0         | 0.11      | 0.74       |
| G1_PHASE                                | 15   | 0.57 | 1.66 | 0         | 0.13      | 0.76       |
| MITOCHONDRIAL_TRANSPORT                 | 19   | 0.57 | 1.65 | 0.06      | 0.14      | 0.78       |

**Supplemental Table S4.** GSEA Analysis results using gene signature after HOTAIR KO in Panc1 cells (20 enriched biological pathways).

| GO TERM Biological Pathways                               | SIZE | ES   | NES  | NOM p-val | FDR q-val | FWER p-val |
|-----------------------------------------------------------|------|------|------|-----------|-----------|------------|
| ORGANELLE_LOCALIZATION                                    | 23   | 0.76 | 2.31 | 0         | 0         | 0          |
| RNA_SPLICING_FACTOR_ACTIVITYTRANSESTERIFICATION_MECHANISM | 16   | 0.81 | 2.21 | 0         | 0         | 0          |
| MICROTUBULE_MOTOR_ACTIVITY                                | 16   | 0.82 | 2.17 | 0         | 0         | 0          |
| M_PHASE_OF_MITOTIC_CELL_CYCLE                             | 83   | 0.58 | 2.15 | 0         | 0         | 0          |
| CELL_DIVISION                                             | 17   | 0.82 | 2.13 | 0         | 0         | 0          |
| SISTER_CHROMATID_SEGREGATION                              | 17   | 0.76 | 2.11 | 0         | 0.004     | 0.02       |
| REGULATION_OF_MITOSIS                                     | 40   | 0.64 | 2.11 | 0         | 0.003     | 0.02       |
| CYTOKINESIS                                               | 15   | 0.80 | 2.09 | 0         | 0.003     | 0.02       |
| SPINDLE                                                   | 37   | 0.67 | 2.08 | 0         | 0.002     | 0.02       |
| CHROMOSOME_SEGREGATION                                    | 31   | 0.68 | 2.08 | 0         | 0.002     | 0.02       |
| CHROMOSOMEPERICENTRIC_REGION                              | 31   | 0.69 | 2.05 | 0         | 0.003     | 0.03       |
| MITOTIC_CELL_CYCLE                                        | 148  | 0.51 | 2.05 | 0         | 0.003     | 0.03       |
| M_PHASE                                                   | 112  | 0.51 | 2.02 | 0         | 0.003     | 0.03       |
| MITOSIS                                                   | 81   | 0.59 | 2.02 | 0         | 0.002     | 0.03       |
| MITOTIC_SISTER_CHROMATID_SEGREGATION                      | 16   | 0.78 | 2.00 | 0         | 0.002     | 0.03       |
| ESTABLISHMENT_OF_ORGANELLE_LOCALIZATION                   | 16   | 0.85 | 1.98 | 0         | 0.003     | 0.04       |
| MOTOR_ACTIVITY                                            | 28   | 0.72 | 1.97 | 0         | 0.003     | 0.05       |
| CELL_CYCLE_PROCESS                                        | 188  | 0.49 | 1.97 | 0         | 0.003     | 0.05       |
| PROTEIN_DNA_COMPLEX_ASSEMBLY                              | 48   | 0.61 | 1.97 | 0         | 0.003     | 0.05       |
| RNA_SPLICING                                              | 82   | 0.54 | 1.92 | 0         | 0.009     | 0.16       |

**Supplemental Table S5. Most upregulated genes (50) after HOTAIR knockout in Panc1 cells.**

| Gene SYMBOL  | DEFINITION                                                                                                                          | Fold Induction | p Value |
|--------------|-------------------------------------------------------------------------------------------------------------------------------------|----------------|---------|
| MX1          | Homo sapiens myxovirus (influenza virus) resistance 1, interferon-inducible protein p78 (mouse) (MX1), mRNA.                        | 9.40           | 0.00044 |
| OAS2         | Homo sapiens 2'-5'-oligoadenylate synthetase 2, 69/71kDa (OAS2), transcript variant 1, mRNA.                                        | 7.24           | 0.00271 |
| IFIT3        | Homo sapiens interferon-induced protein with tetratricopeptide repeats 3 (IFIT3), mRNA.                                             | 6.48           | 0.00114 |
| OAS1         | Homo sapiens 2',5'-oligoadenylate synthetase 1, 40/46kDa (OAS1), transcript variant 3, mRNA.                                        | 5.62           | 0.00012 |
| IFI6         | Homo sapiens interferon, alpha-inducible protein 6 (IFI6), transcript variant 2, mRNA.                                              | 5.54           | 0.00135 |
| VGf          | Homo sapiens VGF nerve growth factor inducible (VGf), mRNA.                                                                         | 5.46           | 0.00023 |
| IFIT1        | Homo sapiens interferon-induced protein with tetratricopeptide repeats 1 (IFIT1), transcript variant 2, mRNA.                       | 5.31           | 0.00334 |
| OASL         | Homo sapiens 2'-5'-oligoadenylate synthetase-like (OASL), transcript variant 2, mRNA.                                               | 5.20           | 0.00001 |
| OAS1         | Homo sapiens 2',5'-oligoadenylate synthetase 1, 40/46kDa (OAS1), transcript variant 3, mRNA.                                        | 5.08           | 0.00579 |
| IL29         | Homo sapiens interleukin 29 (interferon, lambda 1) (IL29), mRNA.                                                                    | 5.03           | 0.00000 |
| IFIT3        | Homo sapiens interferon-induced protein with tetratricopeptide repeats 3 (IFIT3), mRNA.                                             | 4.96           | 0.00469 |
| IFIT3        | Homo sapiens interferon-induced protein with tetratricopeptide repeats 3 (IFIT3), mRNA.                                             | 4.95           | 0.00410 |
| IFIT2        | Homo sapiens interferon-induced protein with tetratricopeptide repeats 2 (IFIT2), mRNA.                                             | 4.79           | 0.00103 |
| IFI27        | Homo sapiens interferon, alpha-inducible protein 27 (IFI27), transcript variant 2, mRNA.                                            | 4.75           | 0.00000 |
| CCL5         | Homo sapiens chemokine (C-C motif) ligand 5 (CCL5), mRNA.                                                                           | 4.47           | 0.00048 |
| IFITM1       | Homo sapiens interferon induced transmembrane protein 1 (9-27) (IFITM1), mRNA.                                                      | 4.39           | 0.00023 |
| ISG20        | Homo sapiens interferon stimulated exonuclease gene 20kDa (ISG20), mRNA.                                                            | 4.32           | 0.00963 |
| OAS1         | Homo sapiens 2',5'-oligoadenylate synthetase 1, 40/46kDa (OAS1), transcript variant 2, mRNA.                                        | 4.30           | 0.00000 |
| HERC5        | Homo sapiens hect domain and RLD 5 (HERC5), mRNA.                                                                                   | 4.03           | 0.00013 |
| IRF7         | Homo sapiens interferon regulatory factor 7 (IRF7), transcript variant b, mRNA.                                                     | 4.02           | 0.00188 |
| CCL5         | Homo sapiens chemokine (C-C motif) ligand 5 (CCL5), mRNA.                                                                           | 4.01           | 0.00008 |
| ISG15        | Homo sapiens ISG15 ubiquitin-like modifier (ISG15), mRNA.                                                                           | 3.99           | 0.00491 |
| HIST1H2BD    | Homo sapiens histone cluster 1, H2bd (HIST1H2BD), transcript variant 2, mRNA.                                                       | 3.96           | 0.00017 |
| GDF15        | Homo sapiens growth differentiation factor 15 (GDF15), mRNA.                                                                        | 3.92           | 0.00849 |
| IL8          | Homo sapiens interleukin 8 (IL8), mRNA.                                                                                             | 3.79           | 0.00007 |
| HIST1H2BD    | Homo sapiens histone cluster 1, H2bd (HIST1H2BD), transcript variant 2, mRNA.                                                       | 3.79           | 0.00315 |
| PRIC285      | Homo sapiens peroxisomal proliferator-activated receptor A interacting complex 285 (PRIC285), transcript variant 2, mRNA.           | 3.73           | 0.00003 |
| SOD2         | Homo sapiens superoxide dismutase 2, mitochondrial (SOD2), nuclear gene encoding mitochondrial protein, transcript variant 3, mRNA. | 3.69           | 0.00383 |
| UBE2L6       | Homo sapiens ubiquitin-conjugating enzyme E2L 6 (UBE2L6), transcript variant 1, mRNA.                                               | 3.56           | 0.00104 |
| CX3CL1       | Homo sapiens chemokine (C-X3-C motif) ligand 1 (CX3CL1), mRNA.                                                                      | 3.50           | 0.01466 |
| HMOX1        | Homo sapiens heme oxygenase (decycling) 1 (HMOX1), mRNA.                                                                            | 3.44           | 0.00009 |
| TTC9B        | Homo sapiens tetratricopeptide repeat domain 9B (TTC9B), mRNA.                                                                      | 3.42           | 0.00003 |
| IRF9         | Homo sapiens interferon regulatory factor 9 (IRF9), mRNA.                                                                           | 3.42           | 0.00449 |
| HIST2H2AA4   | Homo sapiens histone cluster 2, H2aa4 (HIST2H2AA4), mRNA.                                                                           | 3.41           | 0.00640 |
| HIST2H2AA3   | Homo sapiens histone cluster 2, H2aa3 (HIST2H2AA3), mRNA.                                                                           | 3.38           | 0.00006 |
| BST2         | Homo sapiens bone marrow stromal cell antigen 2 (BST2), mRNA.                                                                       | 3.30           | 0.00757 |
| LOC100129681 | PREDICTED: Homo sapiens similar to NPC-A-7 (LOC100129681), mRNA.                                                                    | 3.26           | 0.00155 |
| IL28A        | Homo sapiens interleukin 28A (interferon, lambda 2) (IL28A), mRNA.                                                                  | 3.23           | 0.00265 |
| PARP9        | Homo sapiens poly (ADP-ribose) polymerase family, member 9 (PARP9), mRNA.                                                           | 3.20           | 0.00901 |
| SLC15A3      | Homo sapiens solute carrier family 15, member 3 (SLC15A3), mRNA.                                                                    | 3.14           | 0.00003 |
| IRF7         | Homo sapiens interferon regulatory factor 7 (IRF7), transcript variant b, mRNA.                                                     | 3.13           | 0.00075 |
| PARP12       | Homo sapiens poly (ADP-ribose) polymerase family, member 12 (PARP12), mRNA.                                                         | 3.10           | 0.00001 |
| XAF1         | Homo sapiens XIAP associated factor 1 (XAF1), transcript variant 2, mRNA.                                                           | 3.09           | 0.00143 |
| IFIH1        | Homo sapiens interferon induced with helicase C domain 1 (IFIH1), mRNA.                                                             | 3.09           | 0.00070 |
| HIST2H2AC    | Homo sapiens histone cluster 2, H2ac (HIST2H2AC), mRNA.                                                                             | 3.08           | 0.00077 |
| SAMD9        | Homo sapiens sterile alpha motif domain containing 9 (SAMD9), mRNA.                                                                 | 3.06           | 0.00065 |
| LINCR        | Homo sapiens likely ortholog of mouse lung-inducible Neutralized-related C3HC4 RING domain protein (LINCR), mRNA.                   | 3.04           | 0.00026 |
| HIST2H2AA3   | Homo sapiens histone cluster 2, H2aa3 (HIST2H2AA3), mRNA.                                                                           | 3.02           | 0.00985 |
| SFN          | Homo sapiens stratifin (SFN), mRNA.                                                                                                 | 2.99           | 0.00497 |
| IL8          | Homo sapiens interleukin 8 (IL8), mRNA.                                                                                             | 2.95           | 0.00715 |

**Supplemental Table S6. Most downregulated genes (50) after HOTAIR knockout in Panc1 cells.**

| <b>SYMBOL</b> | <b>DEFINITION</b>                                                                                                       | <b>Fold Change</b> | <b>T test p Value</b> |
|---------------|-------------------------------------------------------------------------------------------------------------------------|--------------------|-----------------------|
| RALA          | Homo sapiens v-ral simian leukemia viral oncogene homolog A (ras related) (RALA), mRNA.                                 | 0.23               | 0.00017               |
| ARL6IP1       | Homo sapiens ADP-ribosylation factor-like 6 interacting protein 1 (ARL6IP1), mRNA.                                      | 0.24               | 0.00028               |
| GSTP1         | Homo sapiens glutathione S-transferase pi (GSTP1), mRNA.                                                                | 0.25               | 0.00402               |
| UBQLN1        | Homo sapiens ubiquilin 1 (UBQLN1), transcript variant 1, mRNA.                                                          | 0.25               | 0.01206               |
| C8orf59       | Homo sapiens chromosome 8 open reading frame 59 (C8orf59), transcript variant 3, mRNA.                                  | 0.25               | 0.00195               |
| CAV1          | Homo sapiens caveolin 1, caveolae protein, 22kDa (CAV1), mRNA.                                                          | 0.26               | 0.00447               |
| SNORA12       | Homo sapiens small nucleolar RNA, H/ACA box 12 (SNORA12), small nucleolar RNA.                                          | 0.27               | 0.00015               |
| PTRF          | Homo sapiens polymerase I and transcript release factor (PTRF), mRNA.                                                   | 0.27               | 0.00000               |
| RAC1          | Homo sapiens ras-related C3 botulinum toxin substrate 1                                                                 | 0.28               | 0.00050               |
| PRDX6         | Homo sapiens peroxiredoxin 6 (PRDX6), mRNA.                                                                             | 0.29               | 0.00027               |
| CAV1          | Homo sapiens caveolin 1, caveolae protein, 22kDa (CAV1), mRNA.                                                          | 0.29               | 0.00490               |
| OSTC          | Homo sapiens oligosaccharyltransferase complex subunit (OSTC), mRNA.                                                    | 0.30               | 0.00005               |
|               | Homo sapiens cDNA: FLJ21333 fis, clone COL02535                                                                         | 0.30               | 0.00308               |
| ALDH1A3       | Homo sapiens aldehyde dehydrogenase 1 family, member A3 (ALDH1A3), mRNA.                                                | 0.30               | 0.00067               |
| PRKCA         | Homo sapiens protein kinase C, alpha (PRKCA), mRNA.                                                                     | 0.31               | 0.00054               |
| MELK          | Homo sapiens maternal embryonic leucine zipper kinase (MELK), mRNA.                                                     | 0.32               | 0.00116               |
| ALDH1A3       | Homo sapiens aldehyde dehydrogenase 1 family, member A3 (ALDH1A3), mRNA.                                                | 0.32               | 0.00263               |
| KRT18P13      | PREDICTED: Homo sapiens keratin 18 pseudogene 13 (KRT18P13), mRNA.                                                      | 0.32               | 0.00009               |
| CMTM6         | Homo sapiens KLF-like MARVEL transmembrane domain containing 6 (CMTM6), mRNA.                                           | 0.32               | 0.00858               |
| FN3KRP        | Homo sapiens fructosamine-3-kinase-related protein (FN3KRP), mRNA.                                                      | 0.33               | 0.00008               |
| LOC653226     | PREDICTED: Homo sapiens similar to Signal recognition particle 9 kDa protein (SRP9)                                     | 0.34               | 0.00004               |
| MELK          | Homo sapiens maternal embryonic leucine zipper kinase (MELK), mRNA.                                                     | 0.35               | 0.00612               |
| FLJ40504      | Homo sapiens hypothetical protein FLJ40504 (FLJ40504), mRNA.                                                            | 0.35               | 0.00590               |
| MICB          | Homo sapiens MHC class I polypeptide-related sequence B (MICB), mRNA.                                                   | 0.35               | 0.00932               |
| LOC646567     | PREDICTED: Homo sapiens similar to HSPC307 (LOC646567), mRNA.                                                           | 0.36               | 0.01902               |
| PBX3          | Homo sapiens pre-B-cell leukemia homeobox 3 (PBX3), mRNA.                                                               | 0.36               | 0.00096               |
| PPP2R1B       | Homo sapiens protein phosphatase 2 (formerly 2A), regulatory subunit A, beta isoform.                                   | 0.36               | 0.00602               |
| TMEM167A      | Homo sapiens transmembrane protein 167A (TMEM167A), mRNA.                                                               | 0.36               | 0.00409               |
| ARPC5         | Homo sapiens actin related protein 2/3 complex, subunit 5, 16kDa (ARPC5), mRNA.                                         | 0.36               | 0.00003               |
| ROD1          | Homo sapiens ROD1 regulator of differentiation 1 (S. pombe) (ROD1), mRNA.                                               | 0.36               | 0.00001               |
| OSTC          | Homo sapiens oligosaccharyltransferase complex subunit (OSTC), mRNA.                                                    | 0.37               | 0.00540               |
| HNRPH3        | Homo sapiens heterogeneous nuclear ribonucleoprotein H3 (2H9) (HNRPH3).                                                 | 0.37               | 0.00001               |
| OSTC          | Homo sapiens oligosaccharyltransferase complex subunit (OSTC), mRNA.                                                    | 0.38               | 0.00002               |
| SRP9          | Homo sapiens signal recognition particle 9kDa (SRP9), mRNA.                                                             | 0.38               | 0.00240               |
| MTHFD1L       | Homo sapiens methylenetetrahydrofolate dehydrogenase (NADP+ dependent) 1-like (MTHFD1L), mRNA.                          | 0.38               | 0.00002               |
| FBXW11        | Homo sapiens F-box and WD repeat domain containing 11 (FBXW11), transcript variant 1, mRNA.                             | 0.38               | 0.00000               |
| DHX33         | Homo sapiens DEAH (Asp-Glu-Ala-His) box polypeptide 33 (DHX33), mRNA.                                                   | 0.38               | 0.00020               |
| CKAP4         | Homo sapiens cytoskeleton-associated protein 4 (CKAP4), mRNA.                                                           | 0.38               | 0.00102               |
| NR2F6         | Homo sapiens nuclear receptor subfamily 2, group F, member 6 (NR2F6), mRNA.                                             | 0.38               | 0.01179               |
|               | Homo sapiens protein tyrosine phosphatase, mitochondrial 1 (PTPMT1), nuclear gene encoding mitochondrial protein, mRNA. | 0.39               | 0.00582               |
| ITGA3         | Homo sapiens integrin, alpha 3 (antigen CD49C, alpha 3 subunit of VLA-3 receptor) (ITGA3), transcript variant a, mRNA.  | 0.39               | 0.00111               |
| TTPAL         | Homo sapiens tocopherol (alpha) transfer protein-like (TTPAL), transcript variant 1, mRNA.                              | 0.40               | 0.00125               |
|               | Homo sapiens mitochondrial ribosomal protein L19 (MRPL19), nuclear gene encoding mitochondrial protein, mRNA.           | 0.40               | 0.00547               |
| MRPL19        |                                                                                                                         | 0.40               | 0.00547               |
| LOC653226     | PREDICTED: Homo sapiens similar to Signal recognition particle 9 kDa protein (SRP9) (LOC653226), mRNA.                  | 0.40               | 0.00053               |
| CNN2          | Homo sapiens calponin 2 (CNN2), transcript variant 2, mRNA.                                                             | 0.40               | 0.00175               |
| CDCA8         | Homo sapiens cell division cycle associated 8 (CDCA8), mRNA.                                                            | 0.40               | 0.00394               |
| PHF19         | Homo sapiens PHD finger protein 19 (PHF19), transcript variant 2, mRNA.                                                 | 0.40               | 0.00598               |
| LOC399965     | PREDICTED: Homo sapiens misc_RNA (LOC399965), miscRNA.                                                                  | 0.40               | 0.06446               |
| ROD1          | Homo sapiens ROD1 regulator of differentiation 1 (S. pombe) (ROD1), mRNA.                                               | 0.41               | 0.00796               |
| LOC729317     | PREDICTED: Homo sapiens similar to voltage-dependent anion channel 2 (LOC729317), mRNA.                                 | 0.41               | 0.01083               |

**Supplemental Table S7.** List of 241 genes differentially regulated [HOTAIR KO (Panc-1) vs. Overexpression (MDA-MB-231)].

| <b>SYMBOL</b> | <b>DEFINITION</b>                                                               | <b>HOTAIR KO<br/>(Panc1)<br/>Fold Change</b> | <b>HOTAIR<br/>Overexpression<br/>(MDA-MB-231)<br/>Fold Change</b> |
|---------------|---------------------------------------------------------------------------------|----------------------------------------------|-------------------------------------------------------------------|
| ABCB6         | Homo sapiens ATP-binding cassette                                               | 1.64                                         | 0.67                                                              |
| ABHD11        | Homo sapiens abhydrolase domain containing 11 (ABHD11)                          | 1.55                                         | 0.27                                                              |
| ABHD2         | Homo sapiens abhydrolase domain containing 2 (ABHD2)                            | 1.53                                         | 4.04                                                              |
| ACACA         | Homo sapiens acetyl-Coenzyme A carboxylase alpha (ACACA)                        | 0.61                                         | 3.03                                                              |
| ACCS          | Homo sapiens 1-aminocyclopropane-1-carboxylate synthase homolog (Arabidopsis)   | 1.52                                         | 3.20                                                              |
| ACLY          | Homo sapiens ATP citrate lyase (ACLY)                                           | 0.63                                         | 2.49                                                              |
| ACOT7         | Homo sapiens acyl-CoA thioesterase 7 (ACOT7)                                    | 0.58                                         | 2.11                                                              |
| ADAR          | Homo sapiens adenosine deaminase                                                | 1.74                                         | 2.20                                                              |
| ADARB1        | Homo sapiens adenosine deaminase                                                | 0.58                                         | 2.46                                                              |
| ADD3          | Homo sapiens adducin 3 (gamma) (ADD3)                                           | 0.65                                         | 2.98                                                              |
| AHNAK         | Homo sapiens AHNAK nucleoprotein (AHNAK)                                        | 0.66                                         | 1.51                                                              |
| AKTIP         | Homo sapiens AKT interacting protein (AKTIP)                                    | 0.56                                         | 3.83                                                              |
| ALDH1A3       | Homo sapiens aldehyde dehydrogenase 1 family                                    | 0.32                                         | 2.16                                                              |
| ALG13         | Homo sapiens asparagine-linked glycosylation 13 homolog (S. cerevisiae) (ALG13) | 1.50                                         | 0.62                                                              |
| AMD1          | Homo sapiens adenosylmethionine decarboxylase 1 (AMD1)                          | 0.64                                         | 3.58                                                              |
| ANO6          | Homo sapiens anoctamin 6 (ANO6)                                                 | 0.63                                         | 0.64                                                              |
| APOL3         | Homo sapiens apolipoprotein L                                                   | 1.87                                         | 1.85                                                              |
| ARHGEF7       | Homo sapiens Rho guanine nucleotide exchange factor (GEF) 7 (ARHGEF7)           | 0.65                                         | 2.27                                                              |
| ARL14         | Homo sapiens ADP-ribosylation factor-like 14 (ARL14)                            | 1.61                                         | 2.15                                                              |
| ARMCX5        | Homo sapiens armadillo repeat containing                                        | 0.54                                         | 2.24                                                              |
| ASPH          | Homo sapiens aspartate beta-hydroxylase (ASPH)                                  | 1.96                                         | 1.84                                                              |
| ATF3          | Homo sapiens activating transcription factor 3 (ATF3)                           | 1.66                                         | 3.26                                                              |
| ATG4A         | Homo sapiens ATG4 autophagy related 4 homolog A (S. cerevisiae) (ATG4A)         | 0.65                                         | 0.53                                                              |
| ATP2B4        | Homo sapiens ATPase                                                             | 0.62                                         | 2.18                                                              |
| B2M           | Homo sapiens beta-2-microglobulin (B2M)                                         | 1.53                                         | 3.44                                                              |
| BAZ2B         | Homo sapiens bromodomain adjacent to zinc finger domain                         | 0.62                                         | 1.66                                                              |
| BCAS4         | Homo sapiens breast carcinoma amplified sequence 4 (BCAS4)                      | 0.65                                         | 1.80                                                              |
| BCL6          | Homo sapiens B-cell CLL/lymphoma 6 (zinc finger protein 51) (BCL6)              | 1.52                                         | 2.25                                                              |
| BTBD3         | Homo sapiens BTB (POZ) domain containing 3 (BTBD3)                              | 0.66                                         | 2.17                                                              |
| C11orf49      | Homo sapiens chromosome 11 open reading frame 49 (C11orf49)                     | 0.64                                         | 2.10                                                              |
| C13orf29      | PREDICTED: Homo sapiens misc_RNA (C13orf29)                                     | 1.57                                         | 1.84                                                              |
| C15orf57      | Homo sapiens chromosome 15 open reading frame 57 (C15orf57)                     | 1.62                                         | 2.49                                                              |
| C1orf86       | Homo sapiens chromosome 1 open reading frame 86 (C1orf86)                       | 1.54                                         | 2.63                                                              |
| C20orf160     | Homo sapiens chromosome 20 open reading frame 160 (C20orf160)                   | 0.48                                         | 2.64                                                              |
| C3orf21       | Homo sapiens chromosome 3 open reading frame 21 (C3orf21)                       | 0.42                                         | 0.66                                                              |
| C5orf41       | Homo sapiens chromosome 5 open reading frame 41 (C5orf41)                       | 1.62                                         | 1.93                                                              |
| CA8           | Homo sapiens carbonic anhydrase VIII (CA8)                                      | 0.56                                         | 1.98                                                              |
| CALML4        | Homo sapiens calmodulin-like 4 (CALML4)                                         | 0.62                                         | 1.72                                                              |
| CAPN12        | Homo sapiens calpain 12 (CAPN12)                                                | 1.53                                         | 0.34                                                              |
| CASP1         | Homo sapiens caspase 1                                                          | 2.21                                         | 2.26                                                              |
| CASP4         | Homo sapiens caspase 4                                                          | 2.16                                         | 1.69                                                              |
| CATSPER2      | Homo sapiens cation channel                                                     | 1.74                                         | 2.23                                                              |
| CCL20         | Homo sapiens chemokine (C-C motif) ligand 20 (CCL20)                            | 2.24                                         | 2.30                                                              |
| CCNYL1        | Homo sapiens cyclin Y-like 1 (CCNYL1)                                           | 1.62                                         | 2.16                                                              |
| CD44          | Homo sapiens CD44 molecule (Indian blood group) (CD44)                          | 0.59                                         | 2.12                                                              |
| CDK6          | Homo sapiens cyclin-dependent kinase 6 (CDK6)                                   | 0.46                                         | 0.18                                                              |
| CDKN1A        | Homo sapiens cyclin-dependent kinase inhibitor 1A (p21                          | 2.59                                         | 2.06                                                              |
| CDKN2D        | Homo sapiens cyclin-dependent kinase inhibitor 2D (p19                          | 1.56                                         | 2.20                                                              |
| CERK          | Homo sapiens ceramide kinase (CERK)                                             | 0.54                                         | 2.08                                                              |
| CHDH          | Homo sapiens choline dehydrogenase (CHDH)                                       | 0.62                                         | 2.29                                                              |

| <b>SYMBOL</b>  | <b>DEFINITION</b>                                                                   | <b>HOTAIR KO<br/>(Panc1)<br/>Fold Change</b> | <b>HOTAIR<br/>Overexpression<br/>(MDA-MB-231)<br/>Fold Change</b> |
|----------------|-------------------------------------------------------------------------------------|----------------------------------------------|-------------------------------------------------------------------|
| CLEC16A        | Homo sapiens C-type lectin domain family 16                                         | 0.62                                         | 0.32                                                              |
| CNN2           | Homo sapiens calponin 2 (CNN2)                                                      | 0.61                                         | 2.65                                                              |
| COL11A1        | Homo sapiens collagen                                                               | 0.60                                         | 2.36                                                              |
| COL5A2         | Homo sapiens collagen                                                               | 0.62                                         | 2.20                                                              |
| COMMD10        | Homo sapiens COMM domain containing 10 (COMMD10)                                    | 0.61                                         | 2.94                                                              |
| CORO6          | Homo sapiens coronin 6 (CORO6)                                                      | 1.85                                         | 1.77                                                              |
| CPD            | Homo sapiens carboxypeptidase D (CPD)                                               | 0.60                                         | 0.65                                                              |
| CREB1          | Homo sapiens cAMP responsive element binding protein 1 (CREB1)                      | 1.59                                         | 0.65                                                              |
| CTBP2          | Homo sapiens C-terminal binding protein 2 (CTBP2)                                   | 0.66                                         | 38.05                                                             |
| CTDSP1         | Homo sapiens CTD (carboxy-terminal domain                                           | 0.66                                         | 2.60                                                              |
| CTDSP2         | Homo sapiens CTD (carboxy-terminal domain                                           | 0.44                                         | 1.68                                                              |
| CX3CL1         | Homo sapiens chemokine (C-X3-C motif) ligand 1 (CX3CL1)                             | 3.50                                         | 0.39                                                              |
| CXCL1          | Homo sapiens chemokine (C-X-C motif) ligand 1 (melanoma growth stimulating activity | 1.73                                         | 0.62                                                              |
| DAGLB          | Homo sapiens diacylglycerol lipase                                                  | 1.51                                         | 0.41                                                              |
| DGKD           | Homo sapiens diacylglycerol kinase                                                  | 1.77                                         | 2.28                                                              |
| DHRS3          | Homo sapiens dehydrogenase/reductase (SDR family) member 3 (DHRS3)                  | 0.62                                         | 1.58                                                              |
| DHX58          | Homo sapiens DEXH (Asp-Glu-X-His) box polypeptide 58 (DHX58)                        | 1.72                                         | 1.94                                                              |
| DIAPH3         | Homo sapiens diaphanous homolog 3 (Drosophila) (DIAPH3)                             | 0.62                                         | 3.46                                                              |
| DICER1         | Homo sapiens Dicer1                                                                 | 0.59                                         | 2.54                                                              |
| DKFZp686O24166 | Homo sapiens hypothetical protein DKFZp686O24166 (DKFZp686O24166)                   | 1.51                                         | 2.29                                                              |
| DTL            | Homo sapiens denticleless homolog (Drosophila) (DTL)                                | 0.54                                         | 0.67                                                              |
| DTX3           | Homo sapiens deltex homolog 3 (Drosophila) (DTX3)                                   | 1.61                                         | 1.74                                                              |
| DUSP19         | Homo sapiens dual specificity phosphatase 19 (DUSP19)                               | 1.64                                         | 3.00                                                              |
| E2F5           | Homo sapiens E2F transcription factor 5                                             | 0.55                                         | 1.86                                                              |
| EAF1           | Homo sapiens ELL associated factor 1 (EAF1)                                         | 0.66                                         | 2.05                                                              |
| EFEMP1         | Homo sapiens EGF-containing fibulin-like extracellular matrix protein 1 (EFEMP1)    | 0.57                                         | 2.25                                                              |
| EGR1           | Homo sapiens early growth response 1 (EGR1)                                         | 1.51                                         | 1.55                                                              |
| EIF4B          | Homo sapiens eukaryotic translation initiation factor 4B (EIF4B)                    | 0.54                                         | 2.15                                                              |
| ELL            | Homo sapiens elongation factor RNA polymerase II (ELL)                              | 1.56                                         | 2.45                                                              |
| ELP4           | Homo sapiens elongation protein 4 homolog (S. cerevisiae) (ELP4)                    | 0.63                                         | 1.77                                                              |
| EPST11         | Homo sapiens epithelial stromal interaction 1 (breast) (EPST11)                     | 1.99                                         | 3.60                                                              |
| ERCC1          | Homo sapiens excision repair cross-complementing rodent repair deficiency           | 1.64                                         | 2.11                                                              |
| ETS2           | Homo sapiens v-ets erythroblastosis virus E26 oncogene homolog 2 (avian) (ETS2)     | 0.50                                         | 1.85                                                              |
| EVL            | Homo sapiens Enah/Vasp-like (EVL)                                                   | 0.52                                         | 0.30                                                              |
| F2RL2          | Homo sapiens coagulation factor II (thrombin) receptor-like 2 (F2RL2)               | 1.85                                         | 2.39                                                              |
| FAF1           | Homo sapiens Fas (TNFRSF6) associated factor 1 (FAF1)                               | 0.58                                         | 2.06                                                              |
| FAM102A        | Homo sapiens family with sequence similarity 102                                    | 1.52                                         | 0.62                                                              |
| FAM119A        | Homo sapiens family with sequence similarity 119                                    | 1.69                                         | 2.19                                                              |
| FAM120A        | Homo sapiens family with sequence similarity 120A (FAM120A)                         | 0.65                                         | 1.74                                                              |
| FAM13B         | Homo sapiens family with sequence similarity 13                                     | 0.67                                         | 2.21                                                              |
| FAM46C         | Homo sapiens family with sequence similarity 46                                     | 0.64                                         | 1.56                                                              |
| FAM72D         | Homo sapiens family with sequence similarity 72                                     | 0.61                                         | 1.60                                                              |
| FBLN1          | Homo sapiens fibulin 1 (FBLN1)                                                      | 0.66                                         | 8.85                                                              |
| FBXO17         | Homo sapiens F-box protein 17 (FBXO17)                                              | 0.66                                         | 0.64                                                              |
| FBXO32         | Homo sapiens F-box protein 32 (FBXO32)                                              | 1.57                                         | 1.81                                                              |
| FBXW11         | Homo sapiens F-box and WD repeat domain containing 11 (FBXW11)                      | 0.53                                         | 1.77                                                              |
| FLJ46906       | PREDICTED: Homo sapiens hypothetical gene supported by AK128874                     | 1.79                                         | 1.84                                                              |
| FXYD5          | Homo sapiens FXD domain containing ion transport regulator 5 (FXYD5)                | 1.52                                         | 1.62                                                              |
| GBP4           | Homo sapiens guanylate binding protein 4 (GBP4)                                     | 2.25                                         | 1.81                                                              |
| GNB5           | Homo sapiens guanine nucleotide binding protein (G protein)                         | 1.54                                         | 2.66                                                              |
| GOSR1          | Homo sapiens golgi SNAP receptor complex member 1 (GOSR1)                           | 0.52                                         | 1.63                                                              |
| GPX7           | Homo sapiens glutathione peroxidase 7 (GPX7)                                        | 0.49                                         | 1.73                                                              |
| GTSE1          | Homo sapiens G-2 and S-phase expressed 1 (GTSE1)                                    | 0.59                                         | 1.92                                                              |
| HAS3           | Homo sapiens hyaluronan synthase 3 (HAS3)                                           | 1.84                                         | 1.85                                                              |



| SYMBOL    | DEFINITION                                                                                           | HOTAIR KO              | HOTAIR                                        |
|-----------|------------------------------------------------------------------------------------------------------|------------------------|-----------------------------------------------|
|           |                                                                                                      | (Panc1)<br>Fold Change | Overexpression<br>(MDA-MB-231)<br>Fold Change |
| HIST1H2AC | Homo sapiens histone cluster 1                                                                       | 2.80                   | 1.82                                          |
| HIST1H2BD | Homo sapiens histone cluster 1                                                                       | 3.79                   | 0.66                                          |
| HIST1H4C  | Homo sapiens histone cluster 1                                                                       | 0.60                   | 1.87                                          |
| HLA-B     | Homo sapiens major histocompatibility complex                                                        | 2.51                   | 0.52                                          |
| HOXC4     | Homo sapiens homeobox C4 (HOXC4)                                                                     | 0.59                   | 2.36                                          |
| HSBP1     | Homo sapiens heat shock factor binding protein 1 (HSBP1)                                             | 0.58                   | 1.76                                          |
| IDH1      | Homo sapiens isocitrate dehydrogenase 1 (NADP+)                                                      | 0.63                   | 0.60                                          |
| IFI44L    | Homo sapiens interferon-induced protein 44-like (IFI44L)                                             | 1.53                   | 1.50                                          |
| IFI6      | Homo sapiens interferon                                                                              | 2.38                   | 1.66                                          |
| IL17RB    | Homo sapiens interleukin 17 receptor B (IL17RB)                                                      | 0.50                   | 0.31                                          |
| IL27RA    | Homo sapiens interleukin 27 receptor                                                                 | 1.53                   | 0.67                                          |
| IL28A     | Homo sapiens interleukin 28A (interferon)                                                            | 3.23                   | 0.28                                          |
| IL28B     | Homo sapiens interleukin 28B (interferon)                                                            | 1.92                   | 2.69                                          |
| IL8       | Homo sapiens interleukin 8 (IL8)                                                                     | 2.95                   | 1.61                                          |
| INSIG1    | Homo sapiens insulin induced gene 1 (INSIG1)                                                         | 0.66                   | 0.54                                          |
| ITGA3     | Homo sapiens integrin                                                                                | 0.39                   | 1.83                                          |
| KCNMA1    | Homo sapiens potassium large conductance calcium-activated channel                                   | 0.46                   | 3.64                                          |
| KIF23     | Homo sapiens kinesin family member 23 (KIF23)                                                        | 0.59                   | 1.52                                          |
| KIF3B     | Homo sapiens kinesin family member 3B (KIF3B)                                                        | 0.45                   | 0.66                                          |
| KLC1      | Homo sapiens kinesin light chain 1 (KLC1)                                                            | 1.57                   | 2.82                                          |
| KLF2      | Homo sapiens Kruppel-like factor 2 (lung) (KLF2)                                                     | 1.66                   | 0.67                                          |
| KRT18     | Homo sapiens keratin 18 (KRT18)                                                                      | 0.61                   | 1.57                                          |
| LAMC2     | Homo sapiens laminin                                                                                 | 1.65                   | 1.67                                          |
| LGALS8    | Homo sapiens lectin                                                                                  | 1.55                   | 2.20                                          |
| LHPP      | Homo sapiens phospholysine phosphohistidine inorganic pyrophosphate phosphatase (LHPP)               | 0.57                   | 4.08                                          |
| LONP2     | Homo sapiens lon peptidase 2                                                                         | 0.63                   | 1.80                                          |
| LRP8      | Homo sapiens low density lipoprotein receptor-related protein 8                                      | 0.49                   | 2.21                                          |
| LYST      | Homo sapiens lysosomal trafficking regulator (LYST)                                                  | 1.61                   | 0.66                                          |
| MAP1S     | Homo sapiens microtubule-associated protein 1S (MAP1S)                                               | 1.53                   | 2.08                                          |
| MAPK8IP2  | Homo sapiens mitogen-activated protein kinase 8 interacting protein 2 (MAPK8IP2)                     | 1.62                   | 2.66                                          |
| MCFD2     | Homo sapiens multiple coagulation factor deficiency 2 (MCFD2)                                        | 0.48                   | 3.54                                          |
| MLLT6     | Homo sapiens myeloid/lymphoid or mixed-lineage leukemia (trithorax homolog)                          | 1.59                   | 3.54                                          |
| MNT       | Homo sapiens MAX binding protein (MNT)                                                               | 1.66                   | 0.63                                          |
| MRPL13    | Homo sapiens mitochondrial ribosomal protein L13 (MRPL13)                                            | 0.50                   | 2.17                                          |
| MRPS6     | Homo sapiens mitochondrial ribosomal protein S6 (MRPS6)                                              | 0.46                   | 1.64                                          |
| MSI2      | Homo sapiens musashi homolog 2 (Drosophila) (MSI2)                                                   | 2.04                   | 4.89                                          |
| MTO1      | Homo sapiens mitochondrial translation optimization 1 homolog (S. cerevisiae) (MTO1)                 | 0.64                   | 1.85                                          |
| MXRA5     | Homo sapiens matrix-remodelling associated 5 (MXRA5)                                                 | 0.64                   | 2.12                                          |
| MYBL1     | Homo sapiens v-myb myeloblastosis viral oncogene homolog (avian)-like 1 (MYBL1)                      | 0.63                   | 1.65                                          |
| MYO3B     | Homo sapiens myosin IIIB (MYO3B)                                                                     | 1.53                   | 0.10                                          |
| NAMPT     | Homo sapiens nicotinamide phosphoribosyltransferase (NAMPT)                                          | 1.52                   | 2.57                                          |
| NCAPD2    | Homo sapiens non-SMC condensin I complex                                                             | 0.61                   | 3.16                                          |
| NEBL      | Homo sapiens nebullette (NEBL)                                                                       | 0.66                   | 23.20                                         |
| NETO2     | Homo sapiens neuropilin (NRP) and tolloid (TLL)-like 2 (NETO2)                                       | 0.47                   | 2.12                                          |
| NFKB2     | Homo sapiens nuclear factor of kappa light polypeptide gene enhancer in B-cells 2 (p49/p100) (NFKB2) | 1.64                   | 1.59                                          |
| NLK       | Homo sapiens nemo-like kinase (NLK)                                                                  | 0.62                   | 1.53                                          |
| NME4      | Homo sapiens non-metastatic cells 4                                                                  | 0.41                   | 3.83                                          |
| NRG1      | Homo sapiens neuregulin 1 (NRG1)                                                                     | 2.59                   | 5.26                                          |
| NRIP3     | Homo sapiens nuclear receptor interacting protein 3 (NRIP3)                                          | 1.52                   | 2.61                                          |
| NT5C3     | Homo sapiens 5'-nucleotidase                                                                         | 1.53                   | 3.54                                          |
| NT5DC1    | Homo sapiens 5'-nucleotidase domain containing 1 (NT5DC1)                                            | 0.42                   | 0.66                                          |
| NUMB      | Homo sapiens numb homolog (Drosophila) (NUMB)                                                        | 0.49                   | 1.71                                          |

| SYMBOL   | DEFINITION                                                                     | HOTAIR KO              | HOTAIR                                        |
|----------|--------------------------------------------------------------------------------|------------------------|-----------------------------------------------|
|          |                                                                                | (Panc1)<br>Fold Change | Overexpression<br>(MDA-MB-231)<br>Fold Change |
| OAS1     | Homo sapiens 2'                                                                | 4.30                   | 1.78                                          |
| OAS2     | Homo sapiens 2'-5'-oligoadenylate synthetase 2                                 | 1.62                   | 2.11                                          |
| OPN3     | Homo sapiens opsin 3 (OPN3)                                                    | 0.61                   | 1.94                                          |
| PAIP2    | Homo sapiens poly(A) binding protein interacting protein 2 (PAIP2)             | 0.59                   | 2.80                                          |
| PARP14   | Homo sapiens poly (ADP-ribose) polymerase family                               | 2.79                   | 1.69                                          |
| PBX3     | Homo sapiens pre-B-cell leukemia homeobox 3 (PBX3)                             | 0.36                   | 0.61                                          |
| PCDH7    | Homo sapiens protocadherin 7 (PCDH7)                                           | 1.87                   | 1.89                                          |
| PEMT     | Homo sapiens phosphatidylethanolamine N-methyltransferase (PEMT)               | 0.60                   | 2.52                                          |
| PFN2     | Homo sapiens profilin 2 (PFN2)                                                 | 0.59                   | 0.62                                          |
| PLAGL2   | Homo sapiens pleiomorphic adenoma gene-like 2 (PLAGL2)                         | 0.64                   | 1.60                                          |
| PLEKHM1  | PREDICTED: Homo sapiens pleckstrin homology domain containing                  | 2.05                   | 3.16                                          |
| PLSCR1   | Homo sapiens phospholipid scramblase 1 (PLSCR1)                                | 1.99                   | 0.65                                          |
| PNMA3    | Homo sapiens paraneoplastic antigen MA3 (PNMA3)                                | 1.70                   | 4.93                                          |
| POFUT1   | Homo sapiens protein O-fucosyltransferase 1 (POFUT1)                           | 0.62                   | 1.84                                          |
| POLDIP3  | Homo sapiens polymerase (DNA-directed)                                         | 0.66                   | 6.71                                          |
| PPP2R2B  | Homo sapiens protein phosphatase 2 (formerly 2A)                               | 0.62                   | 2.97                                          |
| PTBP2    | Homo sapiens polypyrimidine tract binding protein 2 (PTBP2)                    | 1.63                   | 0.63                                          |
| PTPLAD1  | Homo sapiens protein tyrosine phosphatase-like A domain containing 1 (PTPLAD1) | 0.66                   | 1.99                                          |
| RAB3IL1  | Homo sapiens RAB3A interacting protein (rabin3)-like 1 (RAB3IL1)               | 1.65                   | 2.86                                          |
| RAB5B    | Homo sapiens RAB5B                                                             | 0.58                   | 0.62                                          |
| RAP1GAP  | Homo sapiens RAP1 GTPase activating protein (RAP1GAP)                          | 2.72                   | 4.68                                          |
| RASA1    | Homo sapiens RAS p21 protein activator (GTPase activating protein) 1 (RASA1)   | 0.58                   | 2.24                                          |
| RHEB     | Homo sapiens Ras homolog enriched in brain (RHEB)                              | 0.62                   | 0.66                                          |
| RHOU     | Homo sapiens ras homolog gene family                                           | 0.62                   | 0.66                                          |
| RIPPLY2  | Homo sapiens ripply2 homolog (zebrafish) (RIPPLY2)                             | 1.77                   | 3.28                                          |
| RNASEN   | Homo sapiens ribonuclease III                                                  | 0.60                   | 0.66                                          |
| RNF145   | Homo sapiens ring finger protein 145 (RNF145)                                  | 0.55                   | 0.65                                          |
| RPS6KB1  | Homo sapiens ribosomal protein S6 kinase                                       | 0.67                   | 1.77                                          |
| RTN3     | Homo sapiens reticulon 3 (RTN3)                                                | 0.60                   | 1.61                                          |
| SF3B4    | Homo sapiens splicing factor 3b                                                | 0.42                   | 1.56                                          |
| SLC12A2  | Homo sapiens solute carrier family 12 (sodium/potassium/chloride transporters) | 0.58                   | 3.78                                          |
| SLC22A18 | Homo sapiens solute carrier family 22 (organic cation transporter)             | 2.01                   | 1.57                                          |
| SLC30A5  | Homo sapiens solute carrier family 30 (zinc transporter)                       | 0.64                   | 1.67                                          |
| SLC36A1  | Homo sapiens solute carrier family 36 (proton/amino acid symporter)            | 1.52                   | 0.65                                          |
| SLC44A2  | Homo sapiens solute carrier family 44                                          | 1.86                   | 1.97                                          |
| SLC7A11  | Homo sapiens solute carrier family 7                                           | 1.64                   | 1.72                                          |
| SLFN11   | Homo sapiens schlafen family member 11 (SLFN11)                                | 0.61                   | 3.34                                          |
| SMAD5    | Homo sapiens SMAD family member 5 (SMAD5)                                      | 0.63                   | 0.66                                          |
| SMARCD1  | Homo sapiens SWI/SNF related                                                   | 0.56                   | 1.63                                          |
| SOX4     | Homo sapiens SRY (sex determining region Y)-box 4 (SOX4)                       | 0.63                   | 2.54                                          |
| SP1      | Homo sapiens Sp1 transcription factor (SP1)                                    | 0.57                   | 2.15                                          |
| SP100    | Homo sapiens SP100 nuclear antigen (SP100)                                     | 1.82                   | 0.64                                          |
| SP110    | Homo sapiens SP110 nuclear body protein (SP110)                                | 1.84                   | 0.58                                          |
| SPAG9    | Homo sapiens sperm associated antigen 9 (SPAG9)                                | 1.53                   | 3.43                                          |
| SPAST    | Homo sapiens spastin (SPAST)                                                   | 0.66                   | 3.24                                          |
| SPHK1    | Homo sapiens sphingosine kinase 1 (SPHK1)                                      | 1.89                   | 1.98                                          |
| SRPK2    | Homo sapiens SFRS protein kinase 2 (SRPK2)                                     | 1.61                   | 0.53                                          |
| SSTR2    | Homo sapiens somatostatin receptor 2 (SSTR2)                                   | 1.53                   | 1.65                                          |
| ST5      | Homo sapiens suppression of tumorigenicity 5 (ST5)                             | 1.61                   | 2.48                                          |
| STX11    | Homo sapiens syntaxin 11 (STX11)                                               | 1.80                   | 0.63                                          |
| SYP      | Homo sapiens synaptophysin (SYP)                                               | 1.54                   | 2.46                                          |
| SYT11    | Homo sapiens synaptotagmin XI (SYT11)                                          | 1.65                   | 2.20                                          |
| TAF12    | Homo sapiens TAF12 RNA polymerase II                                           | 0.63                   | 1.81                                          |
| TCIRG1   | Homo sapiens T-cell                                                            | 1.52                   | 2.15                                          |

| <b>SYMBOL</b> | <b>DEFINITION</b>                                                               | <b>HOTAIR KO<br/>(Panc1)<br/>Fold Change</b> | <b>HOTAIR<br/>Overexpression<br/>(MDA-MB-231)<br/>Fold Change</b> |
|---------------|---------------------------------------------------------------------------------|----------------------------------------------|-------------------------------------------------------------------|
| TDRD7         | Homo sapiens tudor domain containing 7 (TDRD7)                                  | 1.89                                         | 8.95                                                              |
| TICAM1        | Homo sapiens toll-like receptor adaptor molecule 1 (TICAM1)                     | 1.63                                         | 1.64                                                              |
| TMC6          | Homo sapiens transmembrane channel-like 6 (TMC6)                                | 1.57                                         | 2.60                                                              |
| TMEM140       | Homo sapiens transmembrane protein 140 (TMEM140)                                | 1.98                                         | 0.51                                                              |
| TMEM151A      | Homo sapiens transmembrane protein 151A (TMEM151A)                              | 1.54                                         | 3.05                                                              |
| TMEM159       | Homo sapiens transmembrane protein 159 (TMEM159)                                | 1.55                                         | 1.92                                                              |
| TNFRSF1B      | Homo sapiens tumor necrosis factor receptor superfamily                         | 1.99                                         | 2.33                                                              |
| TOMM34        | Homo sapiens translocase of outer mitochondrial membrane 34 (TOMM34)            | 1.57                                         | 0.65                                                              |
| TTC9B         | Homo sapiens tetratricopeptide repeat domain 9B (TTC9B)                         | 3.42                                         | 1.74                                                              |
| TUBA4A        | Homo sapiens tubulin                                                            | 1.62                                         | 2.39                                                              |
| TYMP          | Homo sapiens thymidine phosphorylase (TYMP)                                     | 1.53                                         | 11.95                                                             |
| UAP1          | Homo sapiens UDP-N-acetylglucosamine pyrophosphorylase 1 (UAP1)                 | 0.61                                         | 1.58                                                              |
| UBA2          | Homo sapiens ubiquitin-like modifier activating enzyme 2 (UBA2)                 | 0.61                                         | 1.52                                                              |
| UBE2L6        | Homo sapiens ubiquitin-conjugating enzyme E2L 6 (UBE2L6)                        | 2.46                                         | 2.18                                                              |
| UBFD1         | Homo sapiens ubiquitin family domain containing 1 (UBFD1)                       | 1.59                                         | 1.56                                                              |
| UBIAD1        | Homo sapiens UbiA prenyltransferase domain containing 1 (UBIAD1)                | 1.62                                         | 1.91                                                              |
| UBQLN1        | Homo sapiens ubiquilin 1 (UBQLN1)                                               | 0.25                                         | 1.51                                                              |
| USP12         | Homo sapiens ubiquitin specific peptidase 12 (USP12)                            | 0.62                                         | 2.13                                                              |
| VPS26A        | Homo sapiens vacuolar protein sorting 26 homolog A (S. pombe) (VPS26A)          | 0.66                                         | 1.91                                                              |
| VWA1          | Homo sapiens von Willebrand factor A domain containing 1 (VWA1)                 | 0.65                                         | 3.04                                                              |
| WDR26         | Homo sapiens WD repeat domain 26 (WDR26)                                        | 0.62                                         | 2.55                                                              |
| XAF1          | Homo sapiens XIAP associated factor 1 (XAF1)                                    | 1.77                                         | 2.65                                                              |
| ZAK           | Homo sapiens sterile alpha motif and leucine zipper containing kinase AZK (ZAK) | 1.55                                         | 2.44                                                              |
| ZBTB4         | Homo sapiens zinc finger and BTB domain containing 4 (ZBTB4)                    | 0.59                                         | 0.63                                                              |
| ZC3HAV1       | Homo sapiens zinc finger CCCH-type                                              | 2.45                                         | 1.72                                                              |
| ZCCHC7        | Homo sapiens zinc finger                                                        | 0.46                                         | 0.67                                                              |
| ZFYVE26       | Homo sapiens zinc finger                                                        | 1.54                                         | 0.64                                                              |
| ZNF318        | Homo sapiens zinc finger protein 318 (ZNF318)                                   | 0.56                                         | 3.98                                                              |
| ZNF483        | Homo sapiens zinc finger protein 483 (ZNF483)                                   | 1.52                                         | 1.58                                                              |
| ZNFX1         | Homo sapiens zinc finger                                                        | 2.06                                         | 2.21                                                              |
| ZSWIM4        | Homo sapiens zinc finger                                                        | 1.84                                         | 1.52                                                              |

**Supplemental Table S8.** Common genes regulated by PRC2/HOTAIR in MDA-MB-231 and after knockdown of HOTAIR in Panc-1 cells.

| Gene Symbol | Description                                                                              | HOTAIR                                        |                                      |
|-------------|------------------------------------------------------------------------------------------|-----------------------------------------------|--------------------------------------|
|             |                                                                                          | Overexpression<br>(MDA-MB-231)<br>Fold Change | HOTAIR KO<br>(Panc-1)<br>Fold Change |
| API5        | apoptosis inhibitor 5                                                                    | 0.85                                          | 0.44                                 |
| BRD7        | Bromodomain containing 7                                                                 | 1.26                                          | 0.50                                 |
| GSTP1       | Glutathione S-transferase pi 1                                                           | 0.69                                          | 0.24                                 |
| KIAA1751    | KIAA1751                                                                                 | 0.82                                          | 1.00                                 |
| MICB        | MHC class I polypeptide-related sequence B                                               | 0.83                                          | 0.35                                 |
| OCIAD2      | OCIA domain containing 2                                                                 | 1.00                                          | 1.43                                 |
| OXS1        | oxidative-stress responsive 1                                                            | 1.10                                          | 0.60                                 |
| RSAD2       | Radical S-adenosyl methionine domain containing 2                                        | 1.34                                          | 2.25                                 |
| SFPQ        | splicing factor proline/glutamine-rich (polypyrimidine tract binding protein associated) | 0.89                                          | 0.65                                 |
